# Supplementary figures and images for: Improving statistical power in severe malaria genetic association studies by augmenting phenotypic precision
Source: eLife journal article supplement (doi:10.7554/elife.69698), 2021-07-05

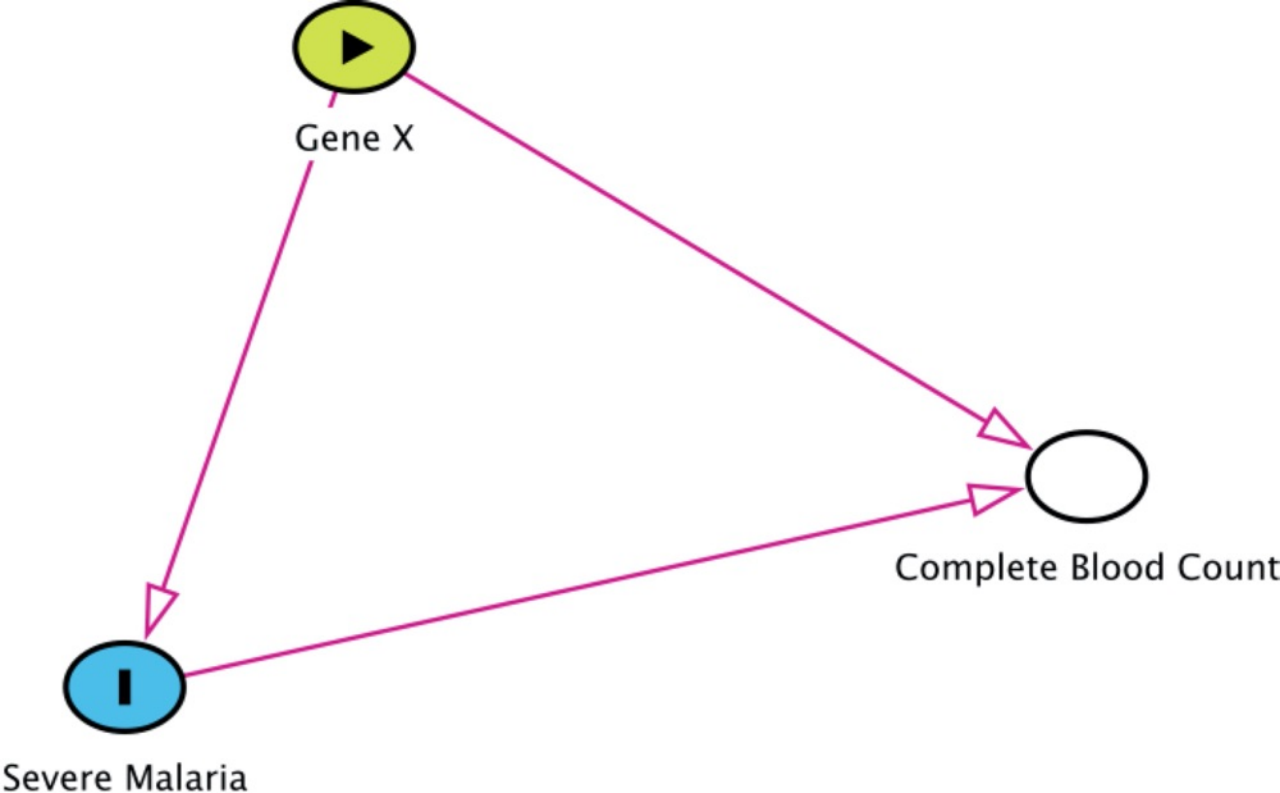

Supplement: supp [file elife-69698-supp-v1.zip]

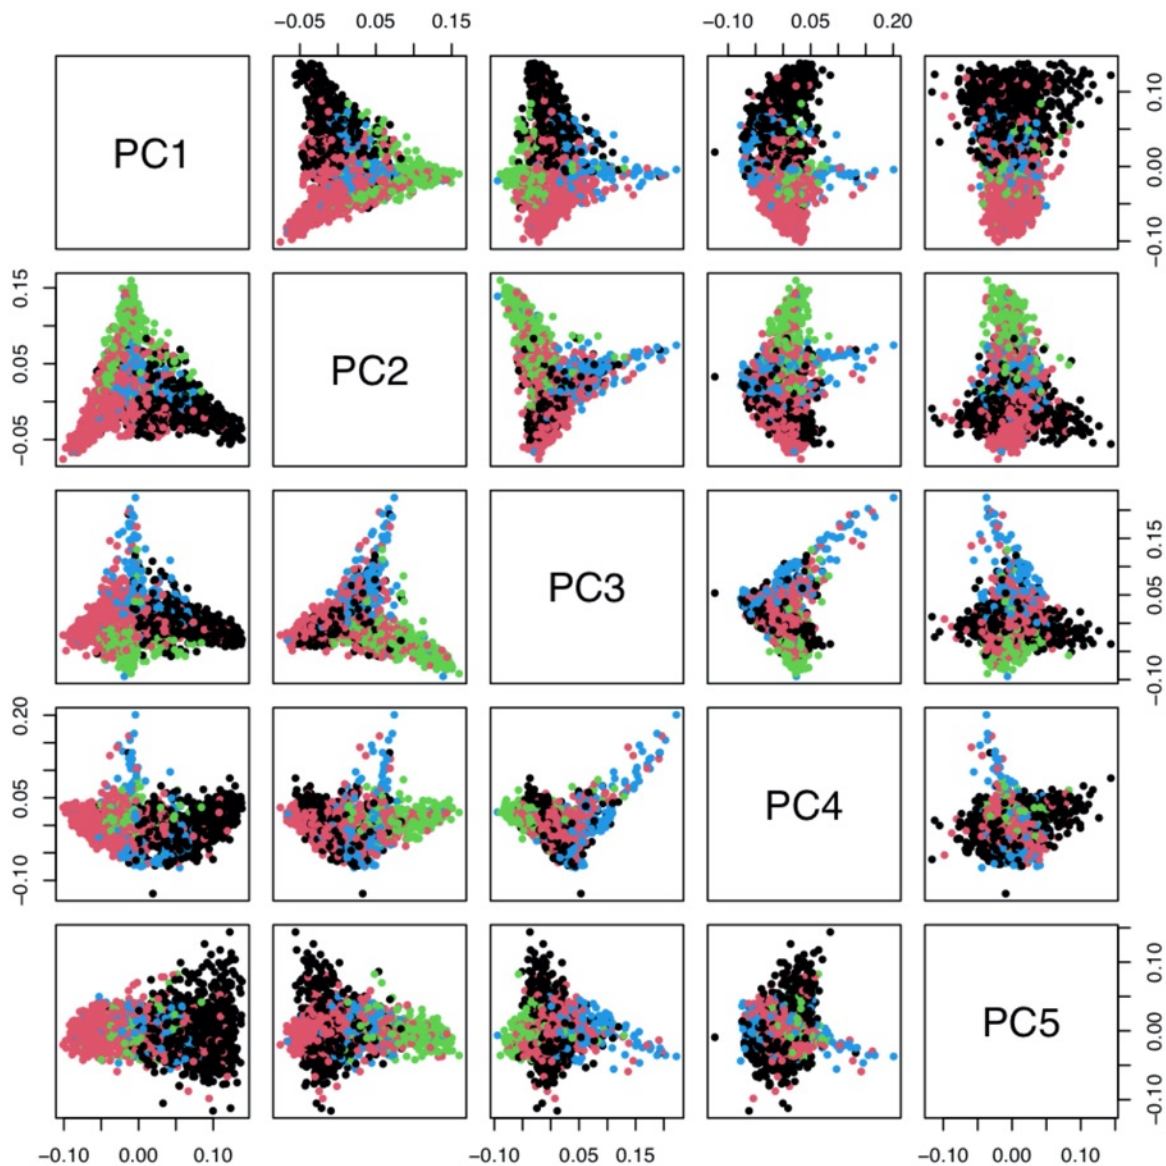

Supplement: supp [file elife-69698-supp-v1.zip]

A

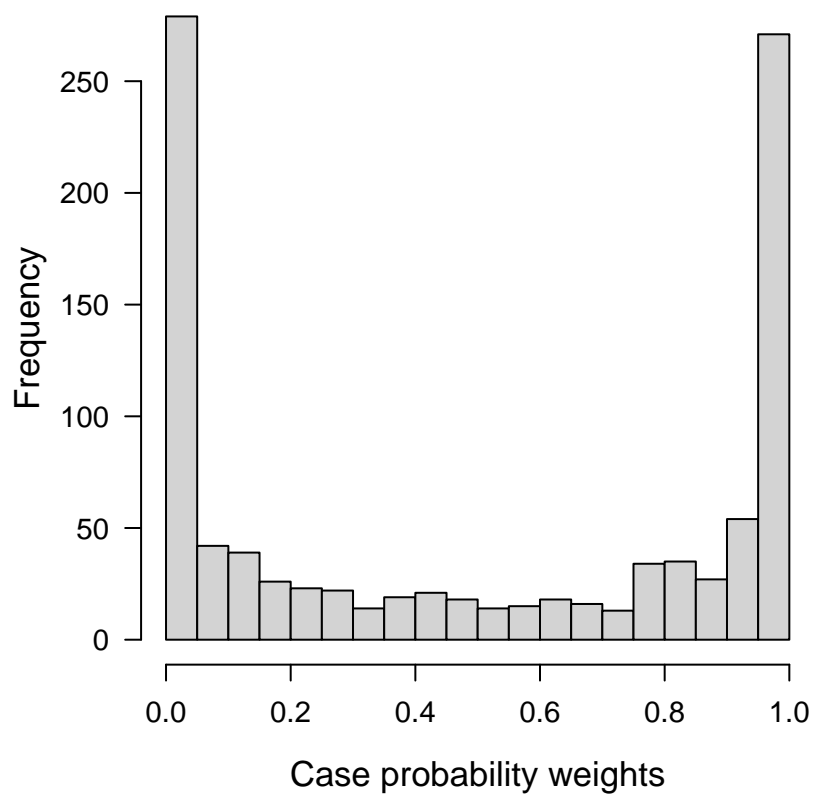

B

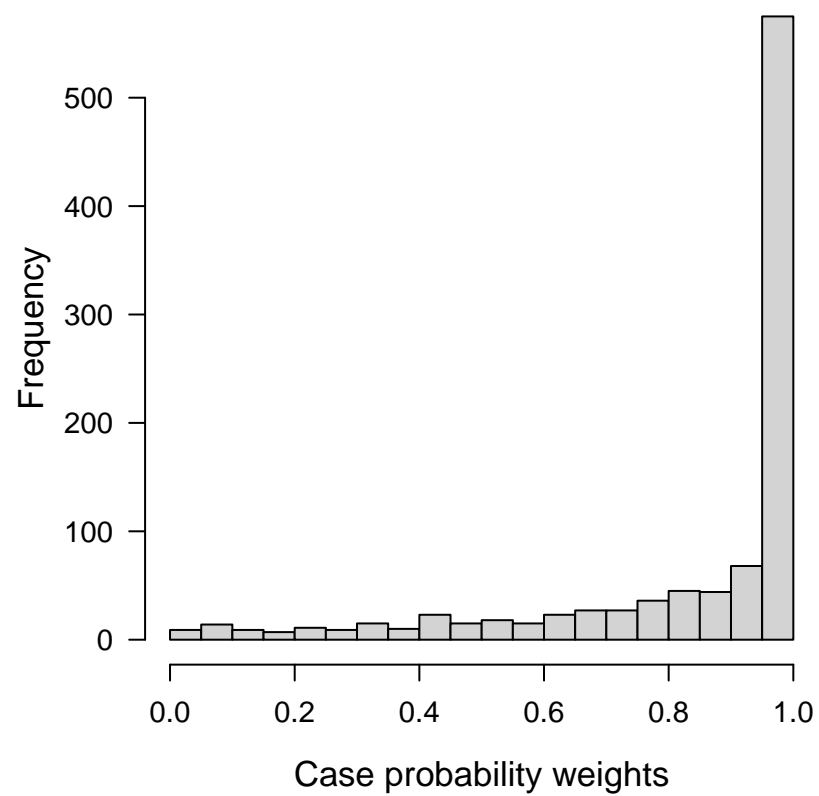

C

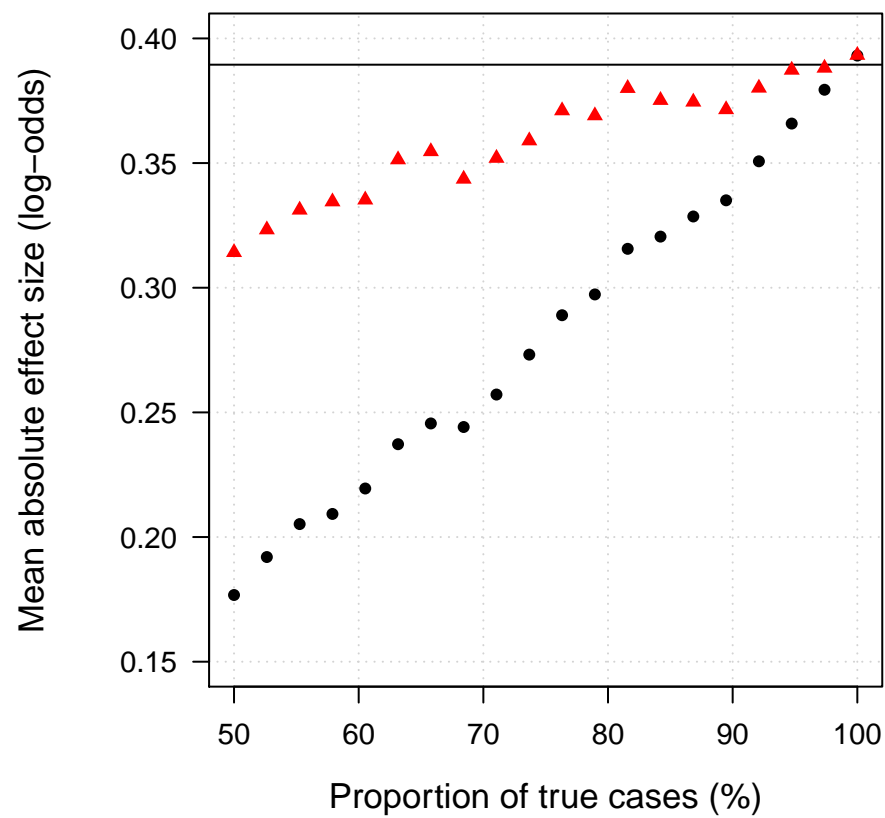

D

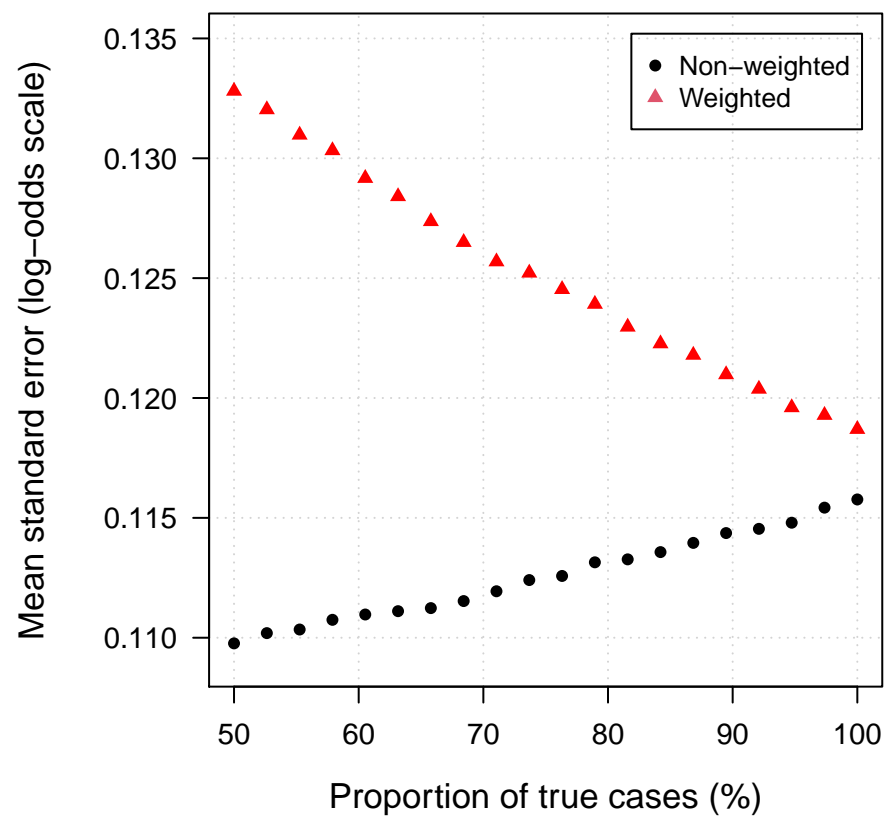

Supplement: supp [file elife-69698-supp-v1.zip]

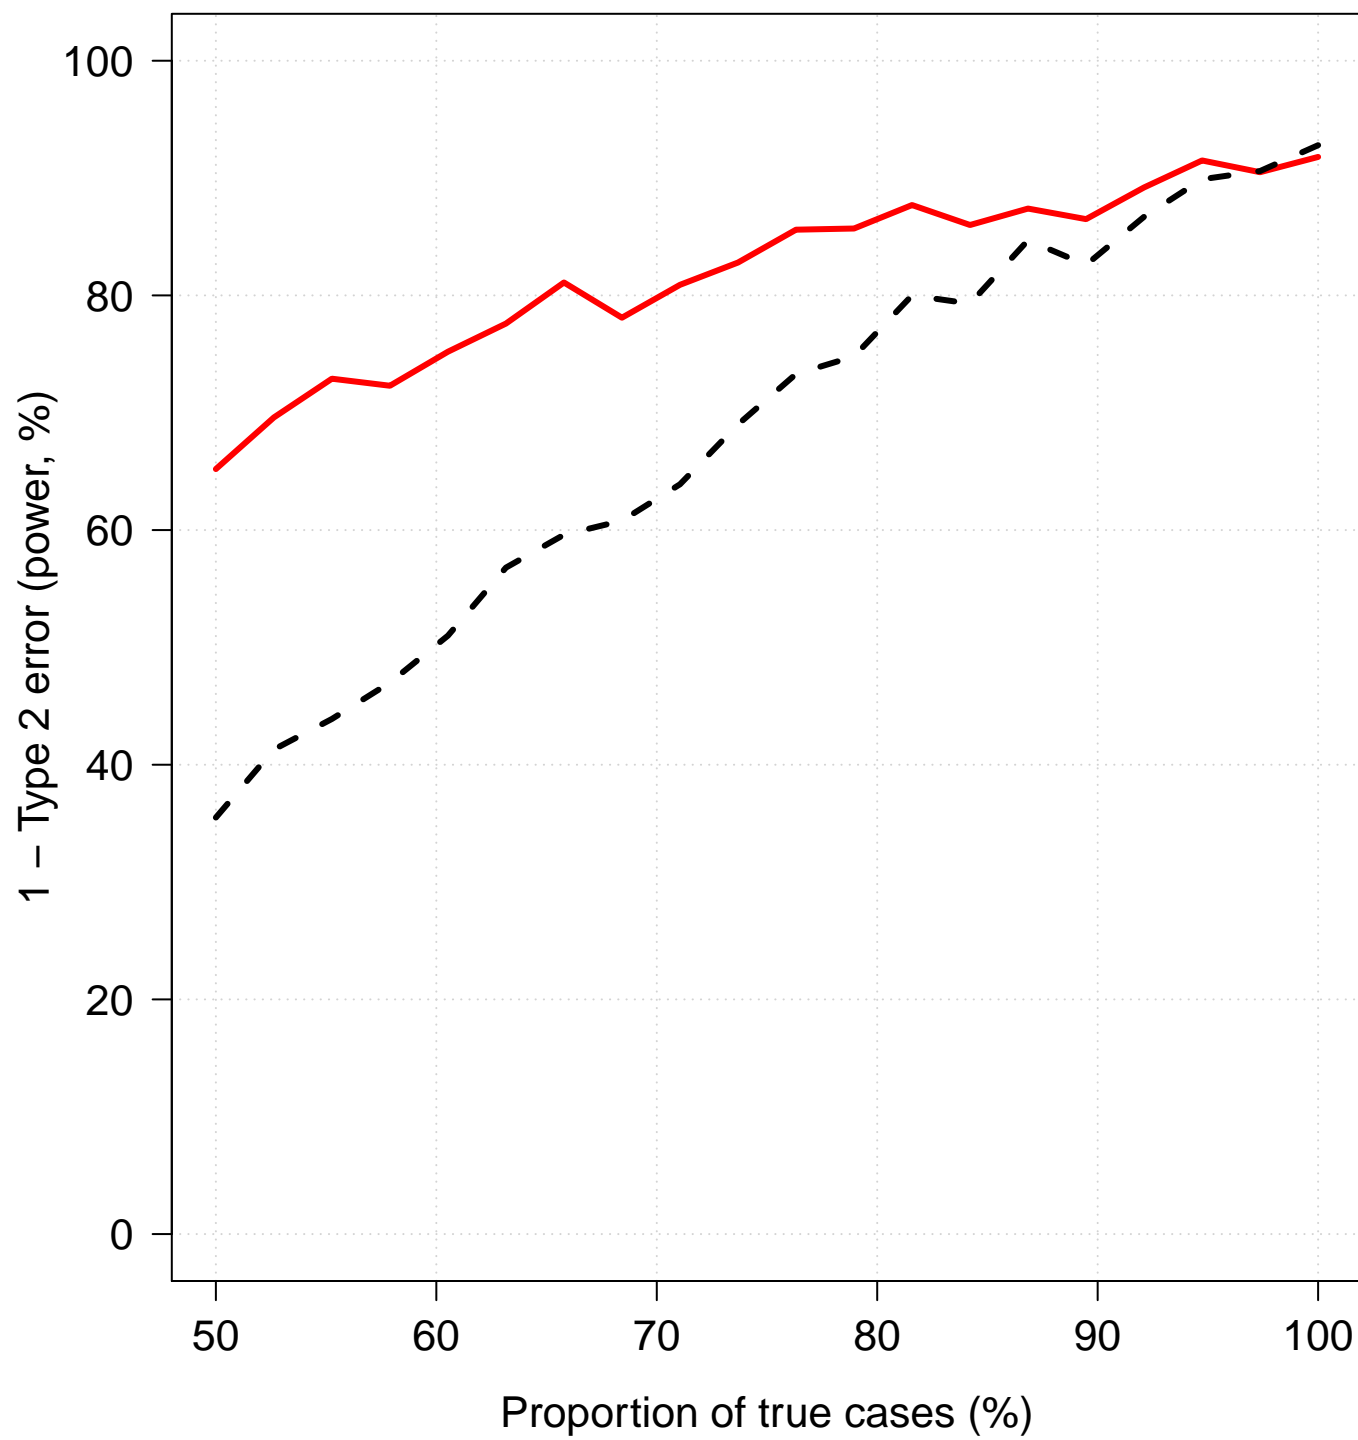

Supplement: supp [file elife-69698-supp-v1.zip]
